# Supplementary material for: 1D-Zigzag Eu3+/Tb3+ Coordination Chains as Luminescent Ratiometric Thermometers Endowed with Multicolor Emission
Source: MDPI journal article supplement (doi:10.3390/ma14216445), 2021-10-27
Supplement: s1 [file s1]

# 1D-Zigzag $\text{Eu}^{3+}/\text{Tb}^{3+}$ Coordination Chains as Luminescent Ratiometric Thermometers Endowed with Multicolor Emission

Luca Bellucci <sup>1,2,3</sup>, Gregorio Bottaro <sup>1,3,\*</sup>, Luca Labella <sup>1,2,\*</sup>, Fabio Marchetti <sup>2</sup>, Simona Samaritani <sup>2</sup>, Daniela Belli Dell'Amico <sup>2</sup> and Lidia Armelao <sup>3,4</sup>

<sup>1</sup> CNR ICMATE and INSTM, Dipartimento di Scienze Chimiche, Università di Padova, via Marzolo 1, I-35131 Padova, Italy; luca.bellucci@phd.unipd.it

<sup>2</sup> Dipartimento di Chimica e Chimica Industriale and CIRCC, Università di Pisa, via Giuseppe Moruzzi 13, I-56124 Pisa, Italy; fabio.marchetti@unipi.it (F.M.); simona.samaritani@unipi.it (S.S.); daniela.belli@unipi.it (D.B.D.)

<sup>3</sup> Dipartimento di Scienze Chimiche, Università di Padova, via Marzolo 1, I-35131 Padova, Italy; lidia.armelao@unipd.it

<sup>4</sup> Dipartimento di Scienze Chimiche e Tecnologie dei Materiali (DSCTM), Consiglio Nazionale delle Ricerche, Piazzale A. Moro 7, 00185 Roma, Italy

\* Correspondence: gregorio.bottaro@cnr.it (G.B.); luca.labella@unipi.it (L.L.); Tel.: +39-049-8275275 (G.B.); +39-050-2219262 (L.L.)

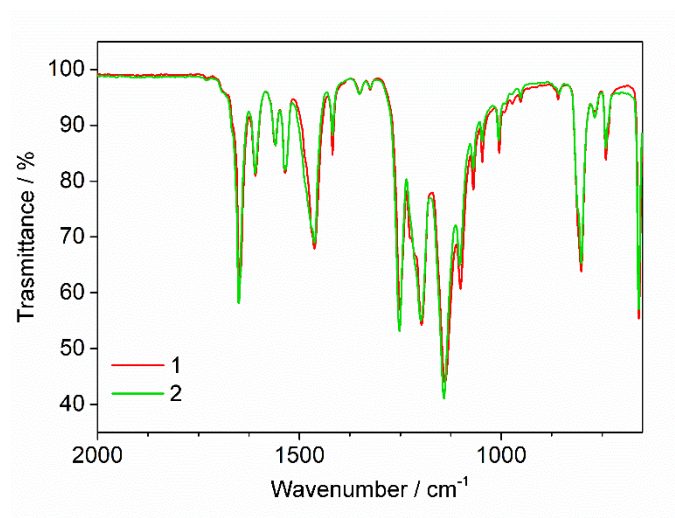

**Figure S1.** Superimposed infrared spectra of  $[\text{Eu}(\text{hfac})_3(\text{bipy})]_n$  (1, red) and  $[\text{Tb}(\text{hfac})_3(\text{bipy})]_n$  (2, green) CPs in the 2000–650  $\text{cm}^{-1}$  wavenumber range.

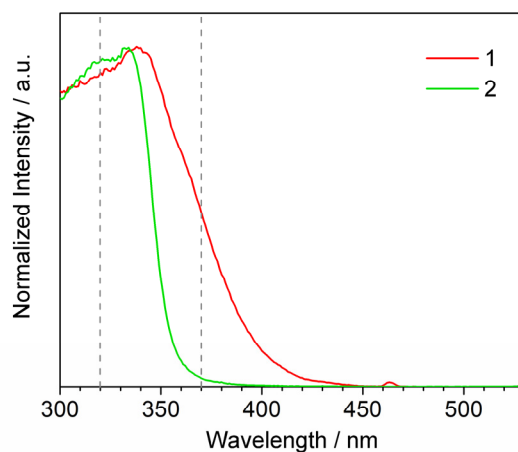

**Figure S2.** Excitation spectra of compound 1 (red) and 2 (green),  $\lambda_{em} = 614$  and  $543$  nm, respectively. The vertical dashed lines highlight the two excitation wavelengths used in the work ( $320$  and  $370$  nm).

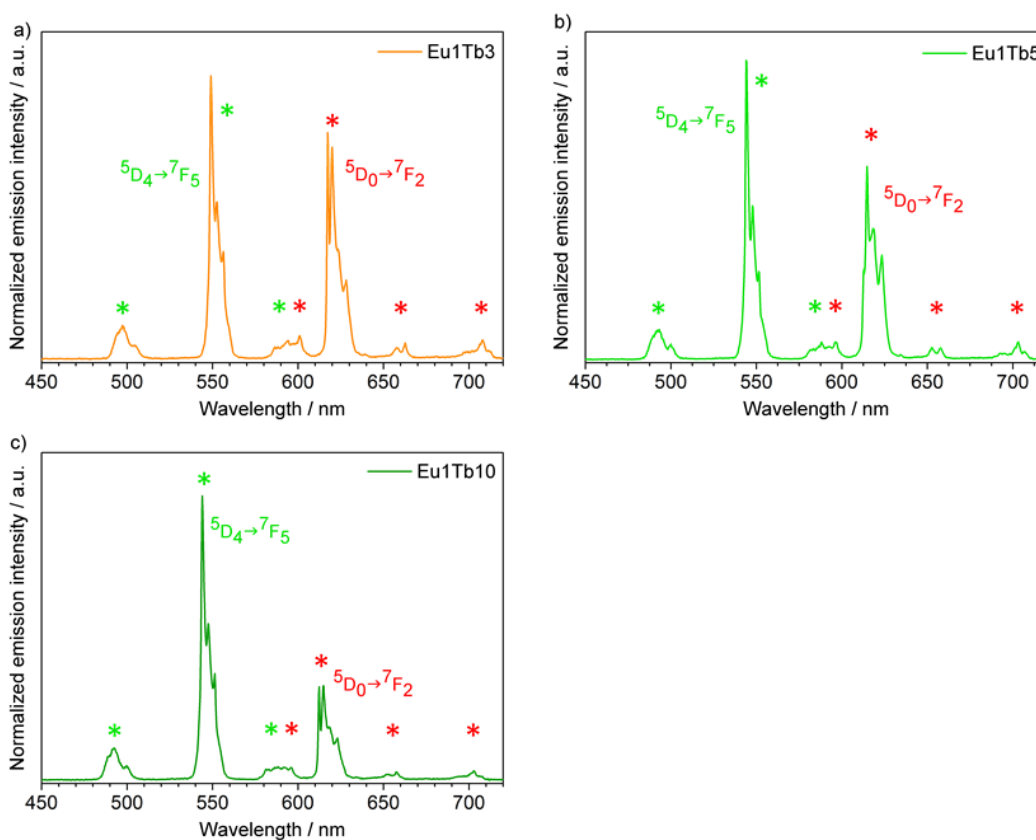

**Figure S3.** Room temperature emission spectra of samples (a) Eu1Tb3, (b) Eu1Tb5 and (c) Eu1Tb10.  $\lambda_{exc} = 320$  nm.

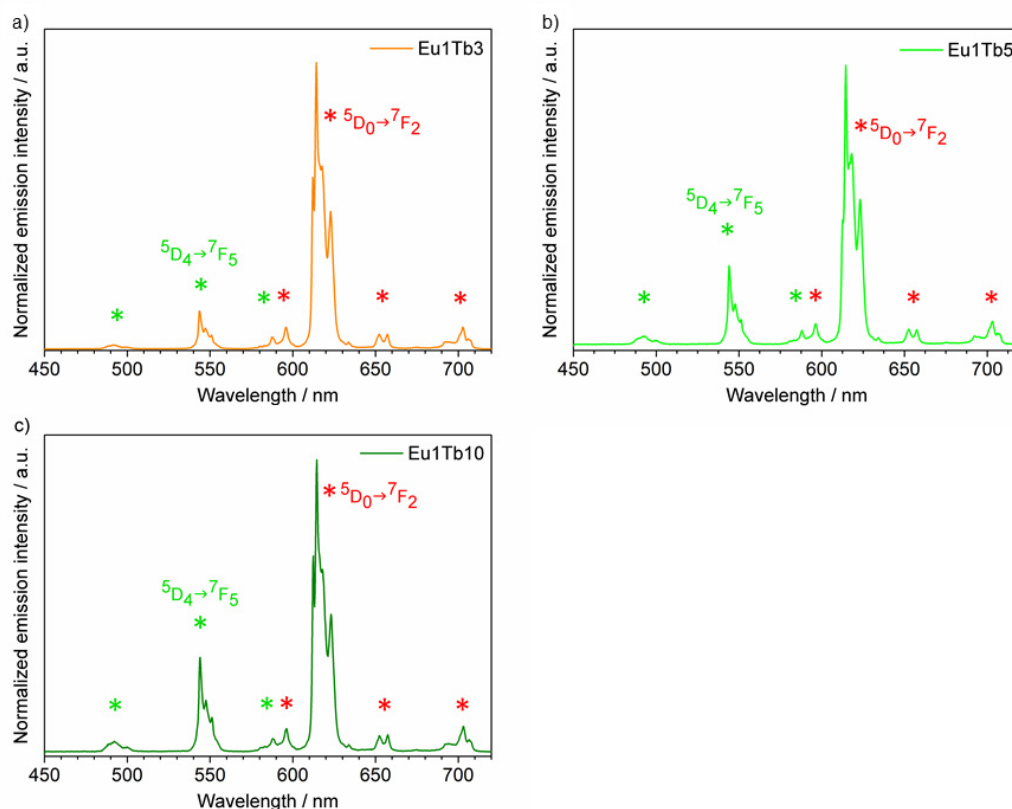

**Figure S4.** Room temperature emission spectra of samples (a) Eu1Tb3, (b) Eu1Tb5 and (c) Eu1Tb10.  $\lambda_{exc} = 370$  nm.

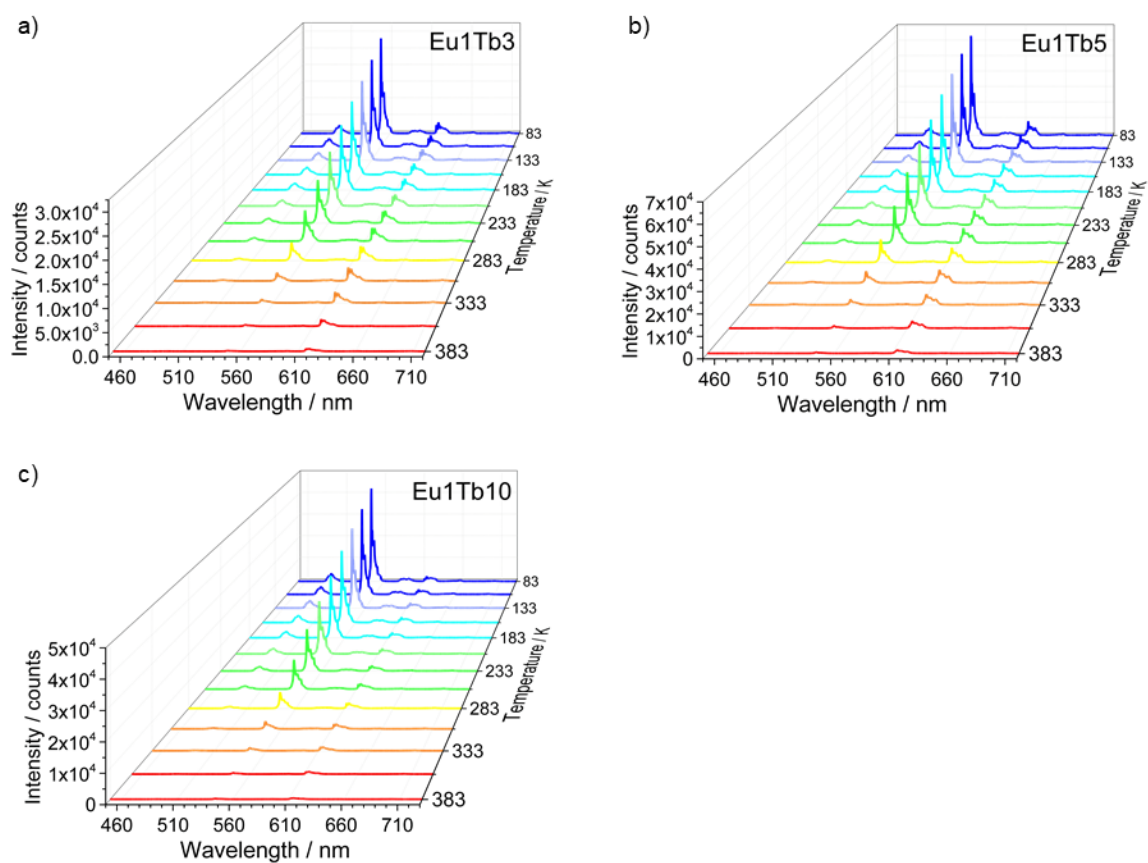

**Figure S5.** Temperature dependent emission spectra of sample (a) Eu1Tb3, (b) Eu1Tb5 and (c) Eu1Tb10.  $\lambda_{exc} = 320$  nm.

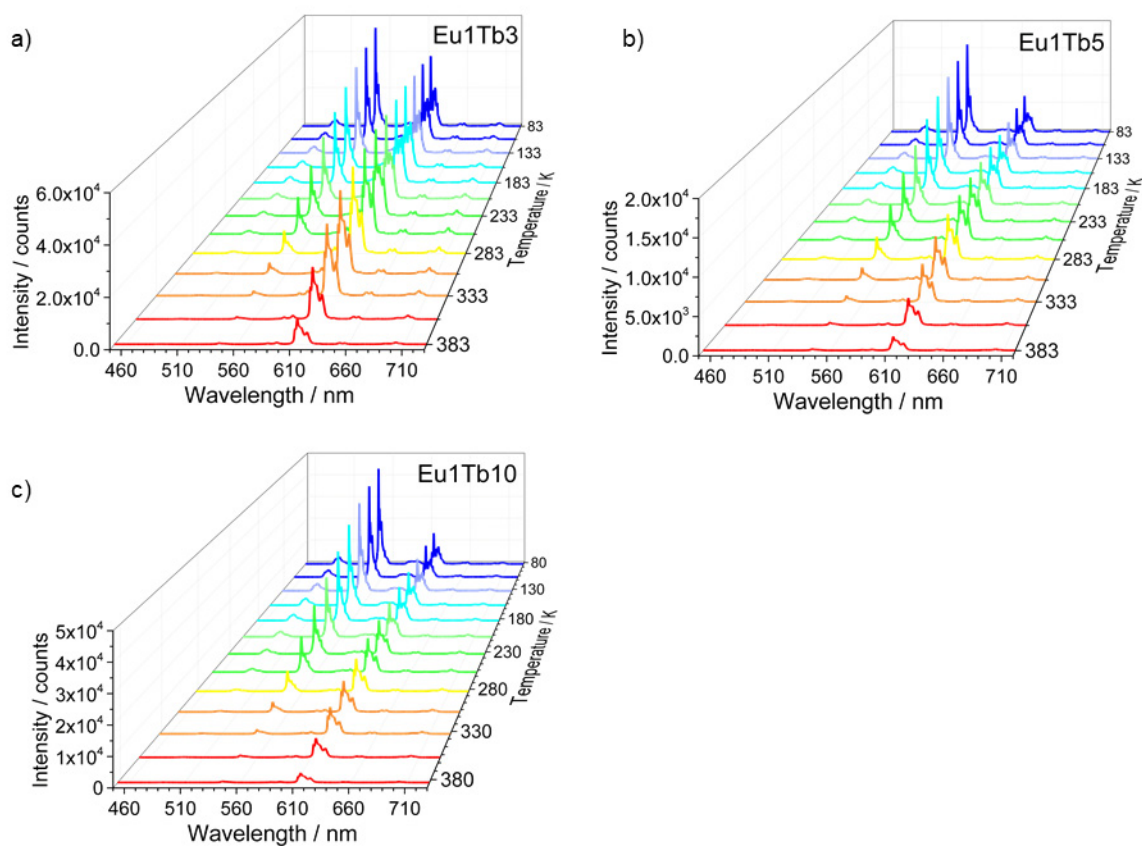

**Figure S6.** Temperature dependent emission spectra of sample (a) Eu1Tb3, (b) Eu1Tb5, (c) Eu1Tb10.  $\lambda_{\text{exc}} = 370$  nm.

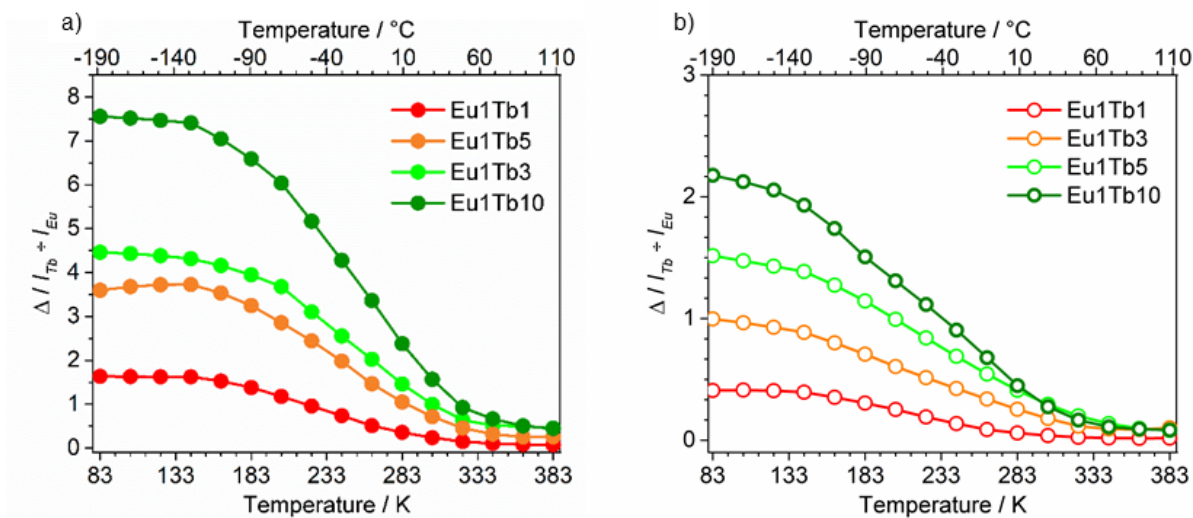

**Figure S7.**  $\Delta$  vs T curves of Eu-Tb mixed samples. (a)  $\lambda_{\text{exc}} = 320$  nm, (b)  $\lambda_{\text{exc}} = 370$  nm.
